# Supplementary material for: Low Dose Low-Molecular-Weight Heparin for Thrombosis Prophylaxis: Systematic Review with Meta-Analysis and Trial Sequential Analysis
Source: PubMed Central journal article supplement (PMC6947554; doi:10.3390/jcm8122039), 2019-11-21
Supplement: jcm-08-02039-s001.pdf [file jcm-08-02039-s001.pdf]

## Table of contents

|                                                                                                     |                                     |
|-----------------------------------------------------------------------------------------------------|-------------------------------------|
| PRISMA checklist .....                                                                              | 2                                   |
| <b>Tables</b>                                                                                       |                                     |
| Supplementary Table S1. Search strategy .....                                                       | 4                                   |
| Supplementary Table S2. Characteristics of included randomized trials, stratified by patient type . | 6                                   |
| Supplementary Table S3. Ongoing trials.....                                                         | 10                                  |
| Supplementary Table S4. Risk of bias assessment.....                                                | <b>Error! Bookmark not defined.</b> |
| Supplementary Table S5. Sensitivity analysis: best-worse and worst-best case scenario's.....        | 11                                  |
| Supplementary Table S6. Sensitivity analysis: trials with publication year $\geq$ 2005 .....        | 16                                  |
| Supplementary Table S7. Sensitivity analysis: including LMWH types not a priori defined .....       | <b>Error! Bookmark not defined.</b> |
| Supplementary Table S8. Subgroup analysis: co-primary outcomes.....                                 | 16                                  |
| Supplementary Table S9. Sensitivity analysis: proportion of SAE and cumulative SAE .....            | 13                                  |
| <b>Figures</b>                                                                                      |                                     |
| Supplementary Figure S1. Forest plot of SAE, stratified for patient type .....                      | 17                                  |
| Supplementary Figure S2. Forest plot of non-major bleeding, stratified for patient type .....       | 18                                  |
| Supplementary Figure S3. Forest plot of any VTE, stratified for patient type.....                   | 19                                  |
| Supplementary Figure S4. Funnel plot of all-cause mortality .....                                   | 20                                  |
| Supplementary Figure S5. Funnel plot of symptomatic VTE .....                                       | 20                                  |
| Supplementary Figure S6. Funnel plot of major bleeding.....                                         | 21                                  |
| Supplementary Figure S7. Funnel plot of any VTE .....                                               | 21                                  |
| References .....                                                                                    | 22                                  |

**PRISMA checklist.**

| Section/topic                      | #  | Checklist item                                                                                                                                                                                                                                                                                              | Reported on page # |
|------------------------------------|----|-------------------------------------------------------------------------------------------------------------------------------------------------------------------------------------------------------------------------------------------------------------------------------------------------------------|--------------------|
| <b>TITLE</b>                       |    |                                                                                                                                                                                                                                                                                                             |                    |
| Title                              | 1  | Identify the report as a systematic review, meta-analysis, or both.                                                                                                                                                                                                                                         | 1                  |
| <b>ABSTRACT</b>                    |    |                                                                                                                                                                                                                                                                                                             |                    |
| Structured summary                 | 2  | Provide a structured summary including, as applicable: background; objectives; data sources; study eligibility criteria, participants, and interventions; study appraisal and synthesis methods; results; limitations; conclusions and implications of key findings; systematic review registration number. | 1                  |
| <b>INTRODUCTION</b>                |    |                                                                                                                                                                                                                                                                                                             |                    |
| Rationale                          | 3  | Describe the rationale for the review in the context of what is already known.                                                                                                                                                                                                                              | 1                  |
| Objectives                         | 4  | Provide an explicit statement of questions being addressed with reference to participants, interventions, comparisons, outcomes, and study design (PICOS).                                                                                                                                                  | 1                  |
| <b>METHODS</b>                     |    |                                                                                                                                                                                                                                                                                                             |                    |
| Protocol and registration          | 5  | Indicate if a review protocol exists, if and where it can be accessed (e.g., Web address), and, if available, provide registration information including registration number.                                                                                                                               | 2                  |
| Eligibility criteria               | 6  | Specify study characteristics (e.g., PICOS, length of follow-up) and report characteristics (e.g., years considered, language, publication status) used as criteria for eligibility, giving rationale.                                                                                                      | 2                  |
| Information sources                | 7  | Describe all information sources (e.g., databases with dates of coverage, contact with study authors to identify additional studies) in the search and date last searched.                                                                                                                                  | 2                  |
| Search                             | 8  | Present full electronic search strategy for at least one database, including any limits used, such that it could be repeated.                                                                                                                                                                               | Suppl. Table 1     |
| Study selection                    | 9  | State the process for selecting studies (i.e., screening, eligibility, included in systematic review, and, if applicable, included in the meta-analysis).                                                                                                                                                   | 2                  |
| Data collection process            | 10 | Describe method of data extraction from reports (e.g., piloted forms, independently, in duplicate) and any processes for obtaining and confirming data from investigators.                                                                                                                                  | 3                  |
| Data items                         | 11 | List and define all variables for which data were sought (e.g., PICOS, funding sources) and any assumptions and simplifications made.                                                                                                                                                                       | 3                  |
| Risk of bias in individual studies | 12 | Describe methods used for assessing risk of bias of individual studies (including specification of whether this was done at the study or outcome level), and how this information is to be used in any data synthesis.                                                                                      | 3                  |
| Summary measures                   | 13 | State the principal summary measures (e.g., risk ratio, difference in means).                                                                                                                                                                                                                               | 3                  |
| Synthesis of results               | 14 | Describe the methods of handling data and combining results of studies, if done, including measures of consistency (e.g., $I^2$ ) for each meta-analysis.                                                                                                                                                   | 4                  |

| Section/topic                 | #  | Checklist item                                                                                                                                                                                           | Reported on page #    |
|-------------------------------|----|----------------------------------------------------------------------------------------------------------------------------------------------------------------------------------------------------------|-----------------------|
| Risk of bias across studies   | 15 | Specify any assessment of risk of bias that may affect the cumulative evidence (e.g., publication bias, selective reporting within studies).                                                             | 3                     |
| Additional analyses           | 16 | Describe methods of additional analyses (e.g., sensitivity or subgroup analyses, meta-regression), if done, indicating which were pre-specified.                                                         | 4                     |
| <b>RESULTS</b>                |    |                                                                                                                                                                                                          |                       |
| Study selection               | 17 | Give numbers of studies screened, assessed for eligibility, and included in the review, with reasons for exclusions at each stage, ideally with a flow diagram.                                          | 5; Fig 2              |
| Study characteristics         | 18 | For each study, present characteristics for which data were extracted (e.g., study size, PICOS, follow-up period) and provide the citations.                                                             | Suppl. Table 2        |
| Risk of bias within studies   | 19 | Present data on risk of bias of each study and, if available, any outcome level assessment (see item 12).                                                                                                | Suppl. Table 4        |
| Results of individual studies | 20 | For all outcomes considered (benefits or harms), present, for each study: (a) simple summary data for each intervention group (b) effect estimates and confidence intervals, ideally with a forest plot. | 5-11                  |
| Synthesis of results          | 21 | Present results of each meta-analysis done, including confidence intervals and measures of consistency.                                                                                                  | 5-11                  |
| Risk of bias across studies   | 22 | Present results of any assessment of risk of bias across studies (see Item 15).                                                                                                                          | 5-11, Suppl. Figs 4-7 |
| Additional analysis           | 23 | Give results of additional analyses, if done (e.g., sensitivity or subgroup analyses, meta-regression [see Item 16]).                                                                                    | Suppl. Table 5-9      |
| <b>DISCUSSION</b>             |    |                                                                                                                                                                                                          |                       |
| Summary of evidence           | 24 | Summarize the main findings including the strength of evidence for each main outcome; consider their relevance to key groups (e.g., healthcare providers, users, and policy makers).                     | 12                    |
| Limitations                   | 25 | Discuss limitations at study and outcome level (e.g., risk of bias), and at review-level (e.g., incomplete retrieval of identified research, reporting bias).                                            | 13                    |
| Conclusions                   | 26 | Provide a general interpretation of the results in the context of other evidence, and implications for future research.                                                                                  | 14                    |
| <b>FUNDING</b>                |    |                                                                                                                                                                                                          |                       |
| Funding                       | 27 | Describe sources of funding for the systematic review and other support (e.g., supply of data); role of funders for the systematic review.                                                               | 14                    |

**Table S1.** Search strategy.

|                                                                                                                                                                                                                                                                                                                                                                                                                                                                                                                                                                                                                                                                                                                                                                                                                                                                                                                                                                                                                                                                                                                                                                                                      |
|------------------------------------------------------------------------------------------------------------------------------------------------------------------------------------------------------------------------------------------------------------------------------------------------------------------------------------------------------------------------------------------------------------------------------------------------------------------------------------------------------------------------------------------------------------------------------------------------------------------------------------------------------------------------------------------------------------------------------------------------------------------------------------------------------------------------------------------------------------------------------------------------------------------------------------------------------------------------------------------------------------------------------------------------------------------------------------------------------------------------------------------------------------------------------------------------------|
| <b>PUBMED/MEDLINE</b>                                                                                                                                                                                                                                                                                                                                                                                                                                                                                                                                                                                                                                                                                                                                                                                                                                                                                                                                                                                                                                                                                                                                                                                |
| ("Heparin, Low-Molecular-Weight"[Mesh] OR low-molecular-weight heparin*[tiab] OR lmwh [tiab] OR "Nadroparin"[Mesh] OR nadroparin*[tiab] OR fraxiparin*[tiab] OR cy 216[tiab] OR cy216[tiab] OR lmf cy216[tiab] OR seleparin*[tiab] OR "Enoxaparin"[Mesh] OR enoxaparin*[tiab] OR clexane[tiab] OR klexane[tiab] OR lovenox[tiab] OR emt 966[tiab] OR emt 967[tiab] OR pk-10,169[tiab] OR pk 10169[tiab] OR pk10169[tiab] OR "Dalteparin"[Mesh] OR dalteparin*[tiab] OR fragmin*[tiab] OR tedelparin[tiab] OR kabi 2165[tiab] OR fr 860[tiab] OR "tinzaparin"[Supplementary Concept] OR tinzaparin*[tiab] OR innohep[tiab] OR logiparin[tiab] OR lhn-1[tiab] OR ardeparin*[tiab] OR normiflo[tiab] OR "bemiparin"[Supplementary Concept] OR bemiparin*[tiab] OR zibor*[tiab] OR "certoparin"[Supplementary Concept] OR certoparin*[tiab] OR mono-embolex[tiab] OR embolex[tiab] OR sandoparin[tiab] OR cy222 OR cy 222 OR "reviparin"[Supplementary Concept] OR reviparin*[tiab] OR clivarin[tiab] OR lu 47311[tiab] OR "parnaparin"[Supplementary Concept] OR parnaparin[tiab] OR cb-01-05-mmx[tiab] OR fluxum[tiab] OR "semuloparin"[Supplementary Concept] OR semuloparin*[tiab] OR ave5026[tiab]) |
| AND                                                                                                                                                                                                                                                                                                                                                                                                                                                                                                                                                                                                                                                                                                                                                                                                                                                                                                                                                                                                                                                                                                                                                                                                  |
| ("Mortality"[Mesh:noexp] OR mortality[tiab] OR "Survival"[Mesh] OR survival [tiab] OR "Thrombosis"[Mesh] OR thrombos*[tiab] OR thrombot*[tiab] OR "Thromboembolism"[Mesh] OR thromboembol*[tiab] OR "Pulmonary Embolism"[Mesh] OR VTE[tiab] OR DVT[tiab])                                                                                                                                                                                                                                                                                                                                                                                                                                                                                                                                                                                                                                                                                                                                                                                                                                                                                                                                            |
| AND                                                                                                                                                                                                                                                                                                                                                                                                                                                                                                                                                                                                                                                                                                                                                                                                                                                                                                                                                                                                                                                                                                                                                                                                  |
| (randomized controlled trial[pt] OR randomi* [tiab] OR randomly[tiab] OR placebo[tiab] OR trial[ti] NOT (animals[mh] NOT humans[mh]))                                                                                                                                                                                                                                                                                                                                                                                                                                                                                                                                                                                                                                                                                                                                                                                                                                                                                                                                                                                                                                                                |
| <b>EMBASE</b>                                                                                                                                                                                                                                                                                                                                                                                                                                                                                                                                                                                                                                                                                                                                                                                                                                                                                                                                                                                                                                                                                                                                                                                        |
| ('low molecular weight heparin'/exp OR ('low molecular' NEXT/3 heparin*):ab,ti OR lmwh:ab,ti OR (nadroparin* OR fraxiparin* OR cy216 OR 'cy 216' OR 'lmf cy216' OR seleparin* OR tedegliparin* OR enoxaparin OR clexane OR klexane OR lovenox OR emt966 OR 'emt 966' OR 'emt 967' OR 'pk 10,169' OR 'pk 10169' OR pk10169 OR dalteparin* OR fragmin* OR tedelparin OR 'kabi2165' OR 'kabi 2165' OR 'fr 860' OR fr860 OR tinzaparin* OR innohep OR logiparin OR 'lhn-1' OR ardeparin OR normiflo OR bemiparin OR zibor OR certoparin OR alphaparin OR 'mono-embolex' OR embolex OR sandoparin OR 'cy 222' OR cy222 OR 'reviparin sodium' OR clivarin* OR 'lu 47311' OR parnaparin OR 'cb-01-05-mmx' OR fluxum OR semuloparin OR ave5026):ab,ti )                                                                                                                                                                                                                                                                                                                                                                                                                                                      |
| AND                                                                                                                                                                                                                                                                                                                                                                                                                                                                                                                                                                                                                                                                                                                                                                                                                                                                                                                                                                                                                                                                                                                                                                                                  |
| ('mortality'/de OR 'mortality':ab,ti OR 'survival'/de OR survival:ab,ti OR 'thromboembolism'/exp OR thrombos*:ab,ti OR thrombot*:ab,ti OR thromboembol*:ab,ti OR 'pulmonary embolism' OR dvt:ab,ti OR vte:ab,ti)                                                                                                                                                                                                                                                                                                                                                                                                                                                                                                                                                                                                                                                                                                                                                                                                                                                                                                                                                                                     |
| AND                                                                                                                                                                                                                                                                                                                                                                                                                                                                                                                                                                                                                                                                                                                                                                                                                                                                                                                                                                                                                                                                                                                                                                                                  |
| ('randomized controlled trial'/exp OR (randomi*ed NEXT/3 controlled NEXT/3 (trial OR study)):ab,ti NOT ('animal'/exp OR 'nonhuman'/exp NOT 'human'/exp))                                                                                                                                                                                                                                                                                                                                                                                                                                                                                                                                                                                                                                                                                                                                                                                                                                                                                                                                                                                                                                             |
| <b>COCHRANE CENTRAL</b>                                                                                                                                                                                                                                                                                                                                                                                                                                                                                                                                                                                                                                                                                                                                                                                                                                                                                                                                                                                                                                                                                                                                                                              |
| (Low-molecular-weight heparin* OR lmwh OR nadroparin* OR fraxiparin* OR cy216 OR "cy 216" OR "lmf cy216" OR seleparin* OR tedegliparin* OR enoxaparin* OR clexane OR klexane OR lovenox OR emt966 OR "emt 966" OR "emt 967" OR "pk-10,169" OR "pk 10169" OR pk10169 OR dalteparin* OR fragmin* OR tedelparin OR kabi2165 OR "kabi 2165" OR "fr 860" OR fr860 OR tinzaparin* OR innohep OR logiparin OR "lhn-1" OR ardeparin OR normiflo OR bemiparin OR zibor OR certoparin OR alphaparin OR "mono-embolex" OR embolex OR sandoparin OR cy222 OR "cy 222" OR reviparin* OR clivarin OR "lu 47311" OR parnaparin OR "cb-01-05-mmx" OR fluxum OR semuloparin OR ave5026)                                                                                                                                                                                                                                                                                                                                                                                                                                                                                                                               |
| AND                                                                                                                                                                                                                                                                                                                                                                                                                                                                                                                                                                                                                                                                                                                                                                                                                                                                                                                                                                                                                                                                                                                                                                                                  |
| (Mortality OR survival OR thrombos* OR thromboembol* OR thrombot* OR pulmonary embolism OR VTE OR DVT OR PE)                                                                                                                                                                                                                                                                                                                                                                                                                                                                                                                                                                                                                                                                                                                                                                                                                                                                                                                                                                                                                                                                                         |
| SEARCH IN: TRIALS                                                                                                                                                                                                                                                                                                                                                                                                                                                                                                                                                                                                                                                                                                                                                                                                                                                                                                                                                                                                                                                                                                                                                                                    |

|                                                                                                                                                                                                                                                                                                                                                                                                                                                                                                                                                                                                                                                                                 |
|---------------------------------------------------------------------------------------------------------------------------------------------------------------------------------------------------------------------------------------------------------------------------------------------------------------------------------------------------------------------------------------------------------------------------------------------------------------------------------------------------------------------------------------------------------------------------------------------------------------------------------------------------------------------------------|
| <b>WEB OF SCIENCE</b>                                                                                                                                                                                                                                                                                                                                                                                                                                                                                                                                                                                                                                                           |
| <b>TS</b> =(Low-molecular-weight heparin* OR lmwh OR nadroparin* OR fraxiparin* OR cy216 OR "cy 216" OR "lmf cy216" OR seleparin* OR tedegliparin* OR enoxaparin* OR clexane OR klexane OR lovenox OR emt966 OR "emt 966" OR "emt 967" OR "pk-10,169" OR "pk 10169" OR pk10169 OR dalteparin* OR fragmin* OR tedelparin OR kabi2165 OR "kabi 2165" OR fr 860 OR fr860 OR tinzaparin* OR innohep OR logiparin OR "lhn-1" OR ardeparin OR normiflo OR bemiparin OR zibor OR certoparin OR alphaparin OR "mono-emborex" OR emborex OR sandoparin OR cy222 OR "cy 222" OR reviparin* OR clivarin OR "lu-47311" OR parnaparin OR "cb-01-05-mmx" OR fluxum OR semuloparin OR ave5026) |
| AND                                                                                                                                                                                                                                                                                                                                                                                                                                                                                                                                                                                                                                                                             |
| <b>TS</b> = (Mortality OR survival OR thrombos* OR thromboembol* OR thrombot* OR pulmonary embolism OR VTE OR DVT OR PE)                                                                                                                                                                                                                                                                                                                                                                                                                                                                                                                                                        |
| AND                                                                                                                                                                                                                                                                                                                                                                                                                                                                                                                                                                                                                                                                             |
| <b>(TS</b> = (random* NEXT/3 trial*) OR <b>TS</b> = (random* NEXT/3 stud*) OR <b>TI</b> =trial* OR <b>TS</b> = ("randomized controlled" OR "randomised controlled"))                                                                                                                                                                                                                                                                                                                                                                                                                                                                                                            |

**Table S2.** Characteristics of included randomized trials, stratified by patient type.

| <b>Trial</b>                        | <b>Patient type</b>                                             | <b>Sample size</b> | <b>Intervention</b>                                         | <b>Duration of intervention</b>         | <b>Control</b>  | <b>Outcomes</b>                                     | <b>Follow-up</b> |
|-------------------------------------|-----------------------------------------------------------------|--------------------|-------------------------------------------------------------|-----------------------------------------|-----------------|-----------------------------------------------------|------------------|
| <b>Acutely ill medical patients</b> |                                                                 |                    |                                                             |                                         |                 |                                                     |                  |
| Fraisse, 2000[1]                    | Critically ill                                                  | 223                | Nadroparin weight based: 44% 5700 IU, 56% 3800 IU, 1x daily | Mean 11.4 +- 6.0 days, max 21 days      | Placebo         | Mortality; SAE, any VTE; major bleeding             | 21 days          |
| Mahe, 2005[2]                       | Acutely ill medical                                             | 2,474              | Nadroparin 2850 IU, 1x daily                                | 21 days or until end of hospitalisation | Placebo         | Mortality; symptomatic VTE; major bleeding          | 21 days          |
| Ozcan, 2004[3]                      | Allogeneic stem cell transplantation                            | 38                 | Dalteparin 2500 IU, 1x daily                                | Day -9 to 100 post transplant           | No intervention | Symptomatic VTE                                     | 9 months         |
| Samama, 1999[4]                     | Acutely ill medical                                             | 735 (1102 total)   | Enoxaparin 20mg, 1x daily                                   | 7 days                                  | Placebo         | Mortality; symptomatic VTE; major bleeding; any VTE | 83-110 days      |
| <b>Surgery</b>                      |                                                                 |                    |                                                             |                                         |                 |                                                     |                  |
| Baca, 1997[5]                       | Elective laparoscopic surgery (appendectomy or cholecystectomy) | 718                | Reviparin 1750 IU, 1x daily                                 | Start at surgery, for at least 6 days   | No intervention | Symptomatic VTE; major bleeding                     | 7 days           |
| Balas, 1992[6]                      | General surgery                                                 | 189                | Nadroparin 2850 IU, 1x daily                                | Start before surgery, at least 5-8 days | Placebo         | Symptomatic VTE; major bleeding; any VTE            | NS               |
| Bergqvist, 1996[7]                  | Acute abdominal surgery                                         | 80                 | Tinzaparin 3500 IU, 1x daily                                | Start after surgery, duration unknown   | Placebo         | Mortality; major bleeding; any VTE                  | 30 days          |
| Burrows, 2001[8]                    | Elective or emergency caesarean section                         | 76                 | Dalteparin 2500 IU, 1x daily                                | Start after surgery, for 5 days         | Placebo         | Mortality; symptomatic VTE; major bleeding          | 6 weeks          |
| Dong, 2018[9]                       | Thoracic cancer surgery                                         | 111                | Nadroparin, 2850 IU, 1x daily                               | Start 24h after surgery, for 7 days     | No intervention | Major bleeding; any VTE                             | 7 days           |
| Marassi, 1993[10]                   | Abdominal cancer surgery                                        | 64                 | Nadroparin 3800 IU, 1x daily                                | Start 12h after surgery, for 7 days     | No intervention | Any VTE                                             | 7 days           |
| Melon, 1991[11]                     | Neurosurgery                                                    | 130                | Enoxaparin 20mg, 1x daily                                   | Start after surgery, for 10 days        | Placebo         | Major bleeding; any VTE                             | 10 days          |
| Murugesan, 2010[12]                 | Major abdominal surgery                                         | 65                 | Nadroparin 3075 IU, 1x daily                                | Start 2h before surgery, for 7-9 days   | No intervention | Symptomatic VTE; any VTE                            | 10 days          |

| <b>Trial</b>                         | <b>Patient type</b>                                                          | <b>Sample size</b> | <b>Intervention</b>                                                   | <b>Duration of intervention</b>         | <b>Control</b>  | <b>Outcomes</b>                                                                         | <b>Follow-up</b> |
|--------------------------------------|------------------------------------------------------------------------------|--------------------|-----------------------------------------------------------------------|-----------------------------------------|-----------------|-----------------------------------------------------------------------------------------|------------------|
| Norberto Garcia, 2013[13]            | Varicose vein surgery                                                        | 264                | Bemiparin 2500 IU, 1x daily                                           | Start 6h after surgery, for 10 days     | No intervention | Mortality; symptomatic VTE; major bleeding; any VTE                                     | 6 months         |
| Nurmohamed, 1996[14]                 | Neurosurgery                                                                 | 485                | Nadroparin, 2850 IU, 1x daily                                         | Start 18-24h after surgery, for 10 days | Placebo         | Mortality; symptomatic VTE; major bleeding; any VTE                                     | 56 days          |
| Ockelford, 1989[15]                  | Major abdominal surgery                                                      | 197                | Dalteparin, 2500 IU, 1x daily                                         | Start 1-2 h before surgery, for 10 days | Placebo         | Mortality; major bleeding; clinically relevant non-major bleeding; any VTE              | 6 weeks          |
| Pezzuoli, 1990[16]                   | General surgery                                                              | 4,498              | Nadroparin, 2850 IU, 1x daily                                         | Start 2h before surgery, for 7 days     | Placebo         | Mortality; symptomatic VTE                                                              | 10 days          |
| Valle, 1988[17]                      | Major abdominal surgery                                                      | 100                | Parnaparin, 3200 IU, 1x daily                                         | Start 2h before surgery, for 7 days     | Placebo         | Major bleeding; any VTE                                                                 | NS               |
| <b>Orthopedics or immobilisation</b> |                                                                              |                    |                                                                       |                                         |                 |                                                                                         |                  |
| Van Adrichem, 2017 (POT-KAST)[18]    | Knee arthroscopy                                                             | 1543               | Nadroparin 2850 IU, dalteparin 2500 IU, 1x daily (>100kg double dose) | 8 days, start after arthroscopy         | No intervention | Mortality, SAE, symptomatic VTE, major bleeding, clinically relevant non-major bleeding | 3 months         |
| Van Adrichem, 2017 (POT-CAST)[18]    | Lower leg casting                                                            | 1519               | Nadroparin 2850 IU, dalteparin 2500 IU, 1x daily (>100kg double dose) | During immobilisation period            | No intervention | Mortality, SAE, symptomatic VTE, major bleeding, clinically relevant non-major bleeding | 3 months         |
| Bruntink, 2017[19]                   | Below-the-knee fractures (ankle or foot) requiring plaster cast for >4 weeks | 310                | Nadroparin, 2850 IU, 1x daily                                         | During immobilisation period            | No intervention | Mortality; symptomatic VTE; major bleeding; any VTE                                     | 40 days          |
| Fuji, 2008a[20]                      | Elective primary total hip arthroplasty patients                             | 209 (436 total)    | Enoxaparin 20mg, 1x daily                                             | 14 days                                 | Placebo         | Major bleeding; SAE; any VTE                                                            | 90 days          |
| Fuji, 2008b[20]                      | Elective primary total knee arthroplasty patients                            | 189 (396 total)    | Enoxaparin 20mg, 1x daily                                             | 14 days                                 | Placebo         | Major bleeding; SAE; any VTE                                                            | 90 days          |
| Jorgensen, 2002[21]                  | Plaster cast for at least 3 weeks, regardless of diagnosis                   | 300                | Tinzaparin, 3500 IU, 1x daily                                         | During cast period                      | No intervention | Mortality; symptomatic VTE; major bleeding; SAE; any VTE                                | NS               |

| <b>Trial</b>                           | <b>Patient type</b>                                                                                                     | <b>Sample size</b> | <b>Intervention</b>                             | <b>Duration of intervention</b>       | <b>Control</b>  | <b>Outcomes</b>                                                                             | <b>Follow-up</b> |
|----------------------------------------|-------------------------------------------------------------------------------------------------------------------------|--------------------|-------------------------------------------------|---------------------------------------|-----------------|---------------------------------------------------------------------------------------------|------------------|
| Kock, 1995[22]                         | Plaster cast immobilisation, for several reasons including surgery                                                      | 391                | Certoparin, 3000 IU, 1x daily                   | During cast period                    | No intervention | Major bleeding; SAE; any VTE                                                                | 15 days          |
| Kujath, 1993[23]                       | Plaster cast for at least 7 days, for lower limb injury                                                                 | 253                | Nadroparin, 2850 IU, 1x daily                   | During cast period                    | No intervention | Any VTE                                                                                     | NS               |
| Lassen, 1991[24]                       | Elective hip replacement surgery                                                                                        | 210                | Tinzaparin, 50 IU/kg (median 3560 IU), 1x daily | Start 2h before surgery, for 7 days   | Placebo         | Mortality; symptomatic VTE; clinically relevant non-major bleeding; any VTE                 | 10 days          |
| Lassen, 2002[25]                       | Plaster cast immobilisation for at least 5 weeks, for lower leg fracture or achilles tendon rupture (with or without OK | 440                | Reviparin, 1750 IU, 1x daily                    | During cast period                    | Placebo         | Mortality; symptomatic VTE; major bleeding; any VTE                                         | 40-50 days       |
| Levine, 1996[26]                       | Elective knee surgery                                                                                                   | 246                | Ardeparin, 50 IU/kg, 2x daily                   | 14 days or until discharge            | Placebo         | Mortality; major bleeding; any VTE                                                          | 14 days          |
| Xiao-Li, 2001[27]                      | Hip and knee surgery                                                                                                    | 46                 | Nadroparin, 41-62 IU / kg, 1x daily             | 10 days                               | NS              | Major bleeding; any VTE                                                                     | NS               |
| Sorensen, 1990[28]                     | Total hip arthroplasty                                                                                                  | 40                 | Tinzaparin, 50 anti-Xa / kg, 1x daily           | 2h before surgery, for 7 days         | No intervention | Any VTE                                                                                     | NS               |
| Roth, 1995[29]                         | Knee arthroscopy                                                                                                        | 122                | Nadroparin, 2850 IU, 1x daily                   | 2h before surgery, for 4 days         | No intervention | Symptomatic VTE; major bleeding                                                             | 6-8 weeks        |
| Wirth, 2001[30]                        | Knee arthroscopy                                                                                                        | 239                | Reviparin, 1750 IU, 1x daily                    | 7 to 10 days                          | No intervention | Symptomatic VTE; major bleeding; any VTE                                                    | 7-10 days        |
| Yoo, 1997[31]                          | Total hip arthroscopy                                                                                                   | 100                | Nadroparin, 2850-5700 IU, 1x daily              | Start 12h before surgery, for 10 days | No intervention | Major bleeding; any VTE                                                                     | 10 days          |
| <b>Ambulatory oncological patients</b> |                                                                                                                         |                    |                                                 |                                       |                 |                                                                                             |                  |
| Agnelli, 2012[32]                      | Ambulatory cancer patients receiving chemotherapy                                                                       | 3,212              | Semuloparin, 20mg, 1x daily                     | Median 3.5 months                     | Placebo         | Mortality; symptomatic VTE; major bleeding; clinically relevant non-major bleeding; any VTE | 1 year           |



| <b>Trial</b>              | <b>Patient type</b>                                                 | <b>Sample size</b> | <b>Intervention</b>                                                     | <b>Duration of intervention</b>                   | <b>Control</b>  | <b>Outcomes</b>                                                                  | <b>Follow-up</b> |
|---------------------------|---------------------------------------------------------------------|--------------------|-------------------------------------------------------------------------|---------------------------------------------------|-----------------|----------------------------------------------------------------------------------|------------------|
| Agnelli, 2009[33]         | Ambulatory cancer patients receiving chemotherapy                   | 1,166              | Nadroparin, 3800 IU, 1x daily                                           | Start at day 1 chemotherapy, for maximum 120 days | Placebo         | Mortality; symptomatic VTE; major bleeding; any VTE                              | 110-120 days     |
| Haas, 2012 (TOPIC-I)[34]  | Ambulatory metastatic breast cancer patients receiving chemotherapy | 353                | Certoparin, 3000 IU, 1x daily                                           | 6 months                                          | Placebo         | Mortality, symptomatic VTE; major bleeding; any VTE                              | 6 months         |
| Haas, 2012 (TOPIC-II)[34] | Ambulatory lung cancer patients receiving chemotherapy              | 547                | Certoparin, 3000 IU, 1x daily                                           | 6 months                                          | Placebo         | Mortality; symptomatic VTE; major bleeding; any VTE                              | 6 months         |
| Lavau-Denes, 2012[35]     | Advanced or metastatic cancer and central venous access device      | 282                | Dalteparin 2500 IU, nadroparin 2850 IU, or enoxaparin 4000 IU, 1x daily | Start within 6 days for 90 days                   | No intervention | Mortality; symptomatic VTE; any VTE                                              | 90 days          |
| Monreal, 1996[36]         | Cancer patients with port-a-cath                                    | 32                 | Dalteparin, 2500 IU, 1x daily                                           | Start 2h before placing catheter, for 90 days     | No intervention | Mortality; major bleeding; any VTE                                               | 90 days          |
| Niers, 2007[37]           | Hematologic malignancy patients receiving CVC                       | 113                | Nadroparin, 2850 IU, 1x daily                                           | 2h before insertion CVC, for 3 weeks              | Placebo         | Symptomatic VTE; major bleeding; clinically relevant non-major bleeding; any VTE | 21 days          |
| Weber, 2008[38]           | Cancer patients admitted for palliative care                        | 20                 | Nadroparin, 2850 IU or 3800 IU, weight based, 1x daily                  | NS                                                | No intervention | Mortality; symptomatic VTE; major bleeding; any VTE                              | 56 days          |
| <b>Neurology</b>          |                                                                     |                    |                                                                         |                                                   |                 |                                                                                  |                  |
| Elias, 1990[39]           | Hemiplegic post-ischemic stroke                                     | 30                 | CY-222 15.000 anti-Xa, 1x daily                                         | Start 48h after infarct, for 14 days              | No intervention | Mortality; symptomatic VTE; major bleeding; any VTE                              | 14 days          |
| Sandset, 1990[40]         | Acute ischemic stroke                                               | 103                | Dalteparin, 3000-5500 IU, weight based, 1x daily                        | Until hospital discharge                          | Placebo         | Major bleeding; any VTE                                                          | 28 days          |
| Wurm, 2004[41]            | Subarachnoid haemorrhage                                            | 117                | Enoxaparin 20mg, 1x daily                                               | Within 72h, for 3 weeks                           | Placebo         | Mortality; symptomatic VTE; major bleeding                                       | 1 year           |

CVC: central venous catheter; h: hours; NS: not stated; SAE: serious adverse events; VTE: venous thromboembolism

**Table S3.** Ongoing trials.

No ongoing trials on low dose low-molecular weight heparin versus placebo or no treatment were identified.

**Table S4.** Risk of bias assessment.

|                          | Risk of bias arising from the randomization process ( <i>selection bias</i> ) | Risk of bias due to deviations from the intended interventions ( <i>performance bias</i> ) | Bias due to missing outcome data ( <i>attrition bias</i> ) | Risk of bias in measurement of the outcome ( <i>ascertainment bias</i> ) | Risk of bias in selection of the reported result |
|--------------------------|-------------------------------------------------------------------------------|--------------------------------------------------------------------------------------------|------------------------------------------------------------|--------------------------------------------------------------------------|--------------------------------------------------|
| Adrichem 2017 (POT-KAST) | +                                                                             | +/-                                                                                        | +                                                          | +                                                                        | +                                                |
| Adrichem 2017 (POT-CAST) | +                                                                             | +/-                                                                                        | +                                                          | +                                                                        | +                                                |
| Agnelli 2009             | +                                                                             | +                                                                                          | +                                                          | +                                                                        | +                                                |
| Agnelli 2012             | +                                                                             | +                                                                                          | +                                                          | +                                                                        | +                                                |
| Baca 1997                | +/-                                                                           | -                                                                                          | +/-                                                        | -                                                                        | +/-                                              |
| Balas 1992               | +/-                                                                           | -                                                                                          | -                                                          | +                                                                        | +/-                                              |
| Bergqvist 1996           | +/-                                                                           | +/-                                                                                        | +                                                          | +                                                                        | +/-                                              |
| Bruntink 2017            | +                                                                             | +/-                                                                                        | -                                                          | +                                                                        | +                                                |
| Burrows 2001             | +/-                                                                           | +                                                                                          | +                                                          | +                                                                        | +                                                |
| Elias 1990               | +/-                                                                           | -                                                                                          | -                                                          | -                                                                        | +/-                                              |
| Dong 2018                | +/-                                                                           | -                                                                                          | -                                                          | +/-                                                                      | +                                                |
| Fraisse 2000             | +/-                                                                           | +/-                                                                                        | +/-                                                        | +                                                                        | +                                                |
| Fuji 2008a               | +/-                                                                           | -                                                                                          | +/-                                                        | +                                                                        | +                                                |
| Fuji 2008b               | +/-                                                                           | -                                                                                          | +/-                                                        | +                                                                        | +                                                |
| Haas 2012 (TOPIC-I)      | +                                                                             | +                                                                                          | +                                                          | +                                                                        | +                                                |
| Haas 2012 (TOPIC-II)     | +                                                                             | +                                                                                          | +                                                          | +                                                                        | +                                                |
| Jorgensen 2002           | +                                                                             | -                                                                                          | -                                                          | +                                                                        | +/-                                              |
| Kock 1995                | +/-                                                                           | -                                                                                          | +                                                          | -                                                                        | +                                                |
| Kujath 1993              | +/-                                                                           | -                                                                                          | +                                                          | +/-                                                                      | +/-                                              |
| Lassen 1991              | +/-                                                                           | +                                                                                          | +/-                                                        | +                                                                        | +/-                                              |
| Lassen 2002              | +                                                                             | +                                                                                          | +                                                          | +                                                                        | +                                                |
| Lavau-Denes 2012         | +/-                                                                           | +/-                                                                                        | +                                                          | -                                                                        | +/-                                              |
| Levine 1996              | +                                                                             | +/-                                                                                        | +                                                          | +                                                                        | +                                                |
| Xiao-Lin 2001            | +/-                                                                           | +/-                                                                                        | +                                                          | -                                                                        | +/-                                              |
| Mahe 2005                | +                                                                             | +                                                                                          | +                                                          | +                                                                        | +                                                |
| Marassi 1993             | +/-                                                                           | +/-                                                                                        | +                                                          | -                                                                        | +/-                                              |
| Melon 1991               | +/-                                                                           | +/-                                                                                        | +                                                          | +/-                                                                      | +                                                |
| Monreal 1996             | +/-                                                                           | +/-                                                                                        | +                                                          | -                                                                        | +/-                                              |

|                      |     |     |     |     |     |
|----------------------|-----|-----|-----|-----|-----|
| Murugesan 2010       | +   | -   | +   | +   | +   |
| Niers 2007           | +   | +/- | +/- | +   | +   |
| Norberto Garcia 2013 | +/- | +/- | +   | +   | +   |
| Nurmohamed 1996      | +   | +   | +/- | +   | +   |
| Ockelford 1989       | +   | -   | +   | +/- | +   |
| Ozcan 2004           | +/- | -   | +/- | -   | +/- |
| Pezzuoli 1990        | +/- | +   | +/- | -   | +   |
| Samama 1999          | +   | +   | +/- | +   | +   |
| Sandset 1990         | -   | +   | -   | +   | +   |
| Sorensen 1990        | -   | +/- | +   | +/- | +/- |
| Roth 1995            | +/- | -   | +/- | -   | -   |
| Valle 1988           | +/- | +/- | +   | +   | +/- |
| Weber 2008           | -   | -   | +   | -   | +/- |
| Wirth 2001           | +/- | +/- | +   | +   | +/- |
| Wurm 2004            | +   | +/- | +   | +   | +/- |
| Yoo 1997             | +/- | +/- | +/- | -   | +/- |

Review of authors' judgements about each risk of bias domain for each included study. '+' indicates low risk of bias; '+/-' indicates some concerns, '-' indicates high risk of bias.

**Table S5.** Sensitivity analysis: best-worse and worst-best case scenario's.

| Outcome                | Bias risk of trials | Trials (patients) | Best-worst case scenario<br>Lost to follow-up with all events in control group | Worst-best case scenario<br>Lost to follow-up with all events in intervention group |
|------------------------|---------------------|-------------------|--------------------------------------------------------------------------------|-------------------------------------------------------------------------------------|
| <b>Mortality</b>       |                     |                   |                                                                                |                                                                                     |
|                        | Low risk            | 5 (4,976)         | RR 1.00 (95% CI 0.90 to 1.12)                                                  | RR 1.05 (95% CI 0.94 to 1.18)                                                       |
|                        | All                 | 23 (15,946)       | RR 0.60 (95% CI 0.42 to 0.86)                                                  | RR 1.52 (95% CI 1.08 to 2.15)                                                       |
| <b>Symptomatic VTE</b> |                     |                   |                                                                                |                                                                                     |
|                        | Low risk            | 5 (4,980)         | RR 0.33 (95% CI 0.14 to 0.80)                                                  | RR 1.35 (95% CI 0.60 to 3.03)                                                       |
|                        | All                 | 25 (16,823)       | RR 0.20 (95% CI 0.11 to 0.36)                                                  | RR 2.87 (95% CI 1.38 to 5.95)                                                       |
| <b>Major bleeding</b>  |                     |                   |                                                                                |                                                                                     |
|                        | Low risk            | 5 (4,980)         | RR 0.90 (95% CI 0.45 to 1.81)                                                  | RR 2.19 (95% CI 0.73 to 6.54)                                                       |
|                        | All                 | 33 (13,641)       | RR 0.30 (95% CI 0.14 to 0.63)                                                  | RR 4.07 (95% CI 1.95 to 8.48)                                                       |

CI: confidence interval; RR: relative risk; VTE: venous thromboembolism.

**Table S6.** Sensitivity analysis: trials with publication year  $\geq$  2005.

| <b>Outcome</b>                                | <b>Trials</b> | <b>Patients</b> | <b>Effect estimate <sup>a</sup></b> |
|-----------------------------------------------|---------------|-----------------|-------------------------------------|
| <b>Mortality</b>                              | 10            | 8,149           | RR 1.01 (95% CI 0.90 to 1.13)       |
| <b>Symptomatic VTE</b>                        | 12            | 8,286           | RR 0.65 (95% CI 0.48 to 0.89)       |
| <b>Major bleeding</b>                         | 13            | 8,458           | RR 1.44 (95% CI 0.68 to 3.03)       |
| <b>SAE</b>                                    | 5             | 4,415           | RR 0.91 (95% CI 0.70 to 1.19)       |
| <b>Clinically relevant non-major bleeding</b> | 3             | 2,999           | RR 0.83 (95% CI 0.22 to 3.14)       |
| <b>Any VTE</b>                                | 10            | 2,170           | RR 0.74 (95% CI 0.55 to 0.97)       |

CI: confidence interval; RR: relative risk; SAE: serious adverse events; VTE: venous thromboembolism.

**Table S7.** Sensitivity analysis: including LMWH types not a priori defined.

| <b>Outcome</b>                                | <b>Included trials</b> | <b>Trials (patients)</b> | <b>Conventional analysis</b> | <b>Trial sequential analysis<sup>a</sup></b><br><i>α 2.5%; β 90%; RRR 20%; D<sup>2</sup> model variance based</i> |
|-----------------------------------------------|------------------------|--------------------------|------------------------------|-------------------------------------------------------------------------------------------------------------------|
| <b>Mortality</b>                              |                        |                          |                              |                                                                                                                   |
|                                               | Low bias risk          | 6 (8,172)                | RR 0.99 (0.93 to 1.06)       | RR 0.99 (0.92 to 1.07)                                                                                            |
|                                               | All                    | 26 (18,973)              | RR 0.99 (0.91 to 1.08)       | RR 0.99 (0.92 to 1.07)                                                                                            |
| <b>VTE symptomatic</b>                        |                        |                          |                              |                                                                                                                   |
|                                               | Low bias risk          | 6 (8,090)                | RR 0.50 (0.33 to 0.77)       | RR 0.52 (0.11 to 2.57)                                                                                            |
|                                               | All                    | 27 (19,160)              | RR 0.55 (0.43 to 0.70)       | RR 0.55 (0.39 to 0.76)                                                                                            |
| <b>Major bleeding</b>                         |                        |                          |                              |                                                                                                                   |
|                                               | Low bias risk          | 6 (8,132)                | RR 1.27 (0.77 to 2.09)       | Insufficient data (<5% of DIS)                                                                                    |
|                                               | All                    | 36 (16,537)              | RR 1.06 (0.76 to 1.48)       | RR 1.02 (0.25 to 4.19)                                                                                            |
| <b>SAE</b>                                    |                        |                          |                              |                                                                                                                   |
|                                               | Low bias risk          | 2 (4,362)                | RR 1.01 (0.91 to 1.13)       | RR 1.01 (0.80 to 1.28)                                                                                            |
|                                               | All                    | 9 (8,392)                | RR 1.02 (0.92 to 1.14)       | RR 1.02 (0.90 to 1.17)<br><i>FUTILITY CROSSED</i>                                                                 |
| <b>Clinically relevant non-major bleeding</b> |                        |                          |                              |                                                                                                                   |
|                                               | Low bias risk          | 1 (3,172)                | RR 1.85 (0.97 to 3.53)       | Insufficient data (<5% of DIS)                                                                                    |
|                                               | All                    | 6 (6,544)                | RR 1.69 (1.04 to 2.74)       | Insufficient data (<5% of DIS)                                                                                    |
| <b>Any VTE</b>                                |                        |                          |                              |                                                                                                                   |
|                                               | Low bias risk          | 3 (1,254)                | RR 0.57 (0.38 to 0.84)       | RR 0.57 (0.11 to 2.82)                                                                                            |
|                                               | All                    | 32 (6,076)               | RR 0.60 (0.49 to 0.72)       | RR 0.62 (0.48 to 0.80)                                                                                            |

α: two-sided significance level, β: power; D<sup>2</sup>: diversity; DIS: diversity adjusted information size; OR: odds ratio; RR: relative risk; RRR: relative risk reduction; SAE: serious adverse events; TSA: trial sequential analysis; VTE: venous thromboembolism; <sup>a</sup> Small discrepancies of the intervention effect estimates between the traditional RevMan meta-analyses and the TSA adjusted results may occur due to different pooling methods (for example the inclusion of zero-event trials in TSA analyses)

**Table S8.** Subgroup analysis: co-primary outcomes.

| Subgroup                                  | Trials | Patients | Effect estimate <sup>a</sup><br>Risk ratio (95%<br>confidence interval) | Test of interaction<br>P-value |
|-------------------------------------------|--------|----------|-------------------------------------------------------------------------|--------------------------------|
| <b>All-cause mortality</b>                |        |          |                                                                         |                                |
| <b>Risk of bias</b>                       | 23     | 15,487   | 0.99 (0.85 to 1.14)                                                     | 0.39                           |
| Low risk of bias                          | 5      | 4,960    | 1.03 (0.92 to 1.16)                                                     |                                |
| High risk of bias                         | 18     | 10,527   | 0.87 (0.60 to 1.26)                                                     |                                |
|                                           |        |          |                                                                         |                                |
| <b>Population</b>                         | 23     | 15,487   | 0.99 (0.85 to 1.14)                                                     | 0.95                           |
| Acutely ill medical                       | 3      | 3,408    | 1.00 (0.83 to 1.22)                                                     |                                |
| Surgery                                   | 6      | 5,584    | 0.66 (0.18 to 2.41)                                                     |                                |
| Orthopedics or immobilisation             | 6      | 3,905    | 0.64 (0.08 to 5.17)                                                     |                                |
| Oncology                                  | 6      | 2,370    | 1.01 (0.89 to 1.16)                                                     |                                |
| Neurology                                 | 2      | 220      | 1.46 (0.16 to 13.13)                                                    |                                |
|                                           |        |          |                                                                         |                                |
| <b>LMWH type</b>                          | 23     | 15,487   | 0.99 (0.85 to 1.14)                                                     | 0.97                           |
| Enoxaparin                                | 2      | 830      | 1.02 (0.72 to 1.45)                                                     |                                |
| Dalteparin                                | 5      | 664      | 0.90 (0.31 to 2.62)                                                     |                                |
| Nadroparin                                | 7      | 9,034    | 0.96 (0.74 to 1.26)                                                     |                                |
| Tinzaparin                                | 3      | 475      | 0.50 (0.07 to 3.82)                                                     |                                |
| Certoparin                                | 2      | 898      | 0.98 (0.73 to 1.32)                                                     |                                |
| Reviparin                                 | 1      | 438      | Not estimable                                                           |                                |
| Bemiparin                                 | 1      | 262      | Not estimable                                                           |                                |
| Parnaparin                                | 0      | 0        | Not estimable                                                           |                                |
| Various                                   | 2      | 2,886    | 0.33 (0.01 to 8.13)                                                     |                                |
|                                           |        |          |                                                                         |                                |
| <b>Length of intervention</b>             | 23     | 15,487   | 0.99 (0.85 to 1.14)                                                     | 0.92                           |
| Intervention period > 30 days             | 6      | 1,824    | 0.96 (0.72 to 1.27)                                                     |                                |
| Intervention period < 30 days             | 17     | 13,663   | 0.98 (0.80 to 1.20)                                                     |                                |
|                                           |        |          |                                                                         |                                |
| <b>Length of follow-up</b>                | 23     | 15,487   | 1.01 (0.91 to 1.12) <sup>b</sup>                                        | 0.55                           |
| Follow-up > 30 days                       | 10     | 3,467    | 1.07 (0.86 to 1.32) <sup>b</sup>                                        |                                |
| Follow-up < 30 days                       | 12     | 11,815   | 0.99 (0.88 to 1.12) <sup>b</sup>                                        |                                |
| Follow-up unclear                         | 1      | 205      | Not estimable                                                           |                                |
|                                           |        |          |                                                                         |                                |
| <b>Symptomatic venous thromboembolism</b> |        |          |                                                                         |                                |
| <b>Risk of bias</b>                       | 25     | 15,920   | 0.62 (0.48 to 0.81)                                                     | 0.75                           |
| Low risk of bias                          | 5      | 4,878    | 0.65 (0.45 to 0.94)                                                     |                                |
| High risk of bias                         | 20     | 11,042   | 0.59 (0.40 to 0.88)                                                     |                                |
|                                           |        |          |                                                                         |                                |
| <b>Population</b>                         | 25     | 15,920   | 0.62 (0.48 to 0.81)                                                     | 0.37                           |
| Acutely ill medical                       | 3      | 3,038    | 0.86 (0.56 to 1.34)                                                     |                                |
| Surgery                                   | 7      | 6,153    | 0.45 (0.22 to 0.91)                                                     |                                |
| Orthopedics or immobilisation             | 8      | 4,199    | 0.61 (0.32 to 1.15)                                                     |                                |
| Oncology                                  | 6      | 2,413    | 0.47 (0.28 to 0.78)                                                     |                                |
| Neurology                                 | 1      | 117      | 1.05 (0.07 to 16.43)                                                    |                                |
|                                           |        |          |                                                                         |                                |

| Subgroup                      | Trials | Patients | Effect estimate <sup>a</sup><br>Risk ratio (95%<br>confidence interval) | Test of interaction<br>P-value |
|-------------------------------|--------|----------|-------------------------------------------------------------------------|--------------------------------|
| <b>LMWH type</b>              | 25     | 15,920   | 0.62 (0.48 to 0.81)                                                     | 0.69                           |
| Enoxaparin                    | 2      | 643      | 1.41 (0.45 to 4.41)                                                     |                                |
| Dalteparin                    | 3      | 387      | 0.85 (0.12 to 5.78)                                                     |                                |
| Nadroparin                    | 10     | 9,136    | 0.58 (0.41 to 0.82)                                                     |                                |
| Tinzaparin                    | 2      | 395      | 0.35 (0.01 to 8.42)                                                     |                                |
| Certoparin                    | 2      | 883      | 0.57 (0.24 to 1.35)                                                     |                                |
| Reviparin                     | 3      | 1,328    | 0.34 (0.05 to 2.50)                                                     |                                |
| Bemiparin                     | 1      | 262      | Not estimable                                                           |                                |
| Parnaparin                    | 0      | 0        | Not estimable                                                           |                                |
| Various                       | 2      | 2,886    | 0.92 (0.45 to 1.88)                                                     |                                |
|                               |        |          |                                                                         |                                |
| <b>Length of intervention</b> | 25     | 15,920   | 0.62 (0.48 to 0.81)                                                     | 0.07                           |
| Intervention period > 30 days | 6      | 2,863    | 0.42 (0.25 to 0.70)                                                     |                                |
| Intervention period < 30 days | 19     | 13,057   | 0.73 (0.53 to 1.00)                                                     |                                |
|                               |        |          |                                                                         |                                |
| <b>Length of follow-up</b>    | 25     | 15,920   | 0.62 (0.48 to 0.81)                                                     | 0.93                           |
| Follow-up > 30 days           | 16     | 7,255    | 0.63 (0.44 to 0.91)                                                     |                                |
| Follow-up < 30 days           | 7      | 8,271    | 0.62 (0.41 to 0.93)                                                     |                                |
| Follow-up unclear             | 2      | 394      | 0.34 (0.01 to 8.17)                                                     |                                |
| <b>Major bleeding</b>         |        |          |                                                                         |                                |
| <b>Risk of bias</b>           | 33     | 13,091   | 1.07 (0.72 to 1.59)                                                     | 0.18                           |
| Low risk of bias              | 5      | 4,960    | 1.70 (0.77 to 3.74)                                                     |                                |
| High risk of bias             | 28     | 8,131    | 0.91 (0.58 to 1.45)                                                     |                                |
|                               |        |          |                                                                         |                                |
| <b>Population</b>             | 33     | 13,091   | 1.07 (0.72 to 1.59)                                                     | 0.30                           |
| Acutely ill medical           | 3      | 3,408    | 0.87 (0.32 to 2.38)                                                     |                                |
| Surgery                       | 10     | 2,313    | 0.98 (0.51 to 1.87)                                                     |                                |
| Orthopedics or immobilisation | 12     | 4,940    | 0.95 (0.23 to 3.92)                                                     |                                |
| Oncology                      | 6      | 2,210    | 2.21 (0.96 to 5.09)                                                     |                                |
| Neurology                     | 2      | 220      | 0.45 (0.12 to 1.66)                                                     |                                |
|                               |        |          |                                                                         |                                |
| <b>LMWH type</b>              | 33     | 13,091   | 1.07 (0.72 to 1.59)                                                     | 0.38                           |
| Enoxaparin                    | 5      | 1,339    | 0.52 (0.23 to 1.18)                                                     |                                |
| Dalteparin                    | 4      | 391      | 1.08 (0.31 to 3.75)                                                     |                                |
| Nadroparin                    | 12     | 5,196    | 1.67 (0.71 to 3.93)                                                     |                                |
| Tinzaparin                    | 2      | 285      | 3.15 (0.13 to 75.08)                                                    |                                |
| Certoparin                    | 3      | 1,237    | 1.93 (0.75 to 4.98)                                                     |                                |
| Reviparin                     | 3      | 1,395    | 0.83 (0.36 to 1.92)                                                     |                                |
| Bemiparin                     | 1      | 262      | Not estimable                                                           |                                |
| Parnaparin                    | 1      | 100      | Not estimable                                                           |                                |
| Various                       | 2      | 2,886    | 0.98 (0.06 to 15.72)                                                    |                                |
|                               |        |          |                                                                         |                                |
| <b>Length of intervention</b> | 33     | 13,091   | 1.07 (0.72 to 1.59)                                                     | 0.04                           |
| Intervention period > 30 days | 7      | 2,721    | 2.20 (1.00 to 4.82)                                                     |                                |
| Intervention period < 30 days | 26     | 10,370   | 0.84 (0.53 to 1.32)                                                     |                                |
|                               |        |          |                                                                         |                                |
| <b>Length of follow-up</b>    | 33     | 13,091   | 1.07 (0.72 to 1.59)                                                     | 0.49                           |
| Follow-up > 30 days           | 18     | 7,944    | 1.18 (0.72 to 1.93)                                                     |                                |
| Follow-up < 30 days           | 11     | 4,607    | 0.96 (0.48 to 1.91)                                                     |                                |

| <b>Subgroup</b>   | <b>Trials</b> | <b>Patients</b> | <b>Effect estimate <sup>a</sup></b><br>Risk ratio (95%<br>confidence interval) | <b>Test of interaction</b><br>P-value |
|-------------------|---------------|-----------------|--------------------------------------------------------------------------------|---------------------------------------|
| Follow-up unclear | 4             | 540             | 0.20 (0.01 to 4.15)                                                            |                                       |

<sup>a</sup> Meta-analyses were performed using a random-effects model unless stated otherwise; <sup>b</sup> Meta-analysis performed using a fixed effect model.

**Table S9.** Sensitivity analysis: proportion of SAE and cumulative SAE.

| <b>Outcome</b> | <b>Trials<br/>(patients)</b> | <b>SAE – proportion</b>       | <b>SAE – cumulative</b>       |
|----------------|------------------------------|-------------------------------|-------------------------------|
| <b>SAE</b>     | 37 (18,688)                  | RR 0.96 (95% CI 0.87 to 1.07) | RR 0.94 (95% CI 0.87 to 1.02) |

CI: confidence interval; RR: relative risk; SAE: serious adverse events.



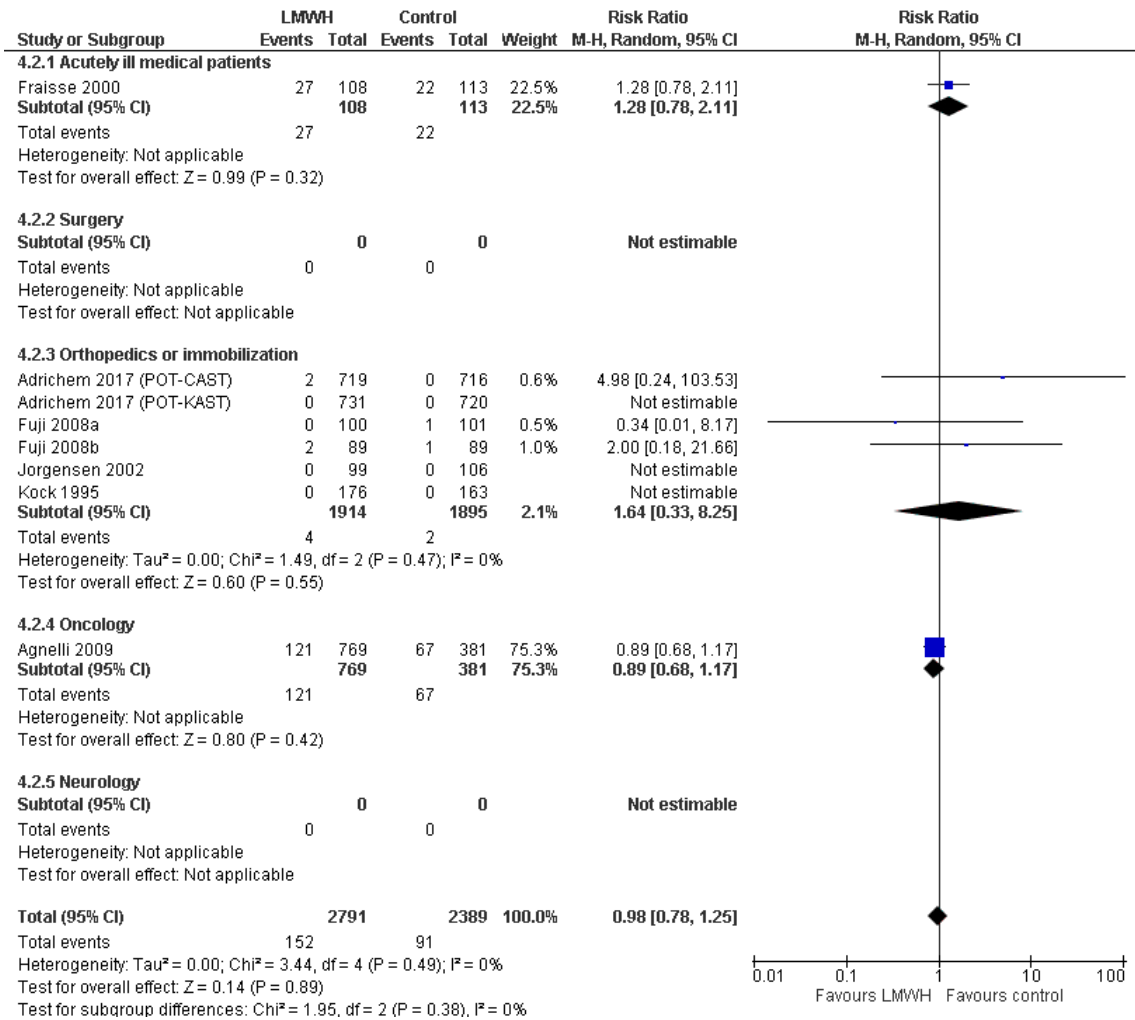

**Figure S1.** Forest plot of SAE, stratified for patient type. Forest plot of Serious Adverse Events (SAE) at maximal follow-up of LMWH prophylaxis compared to placebo or no treatment, stratified according to patient type. Size of the squares reflects the weight of the trial in the pooled analysis. Horizontal bars represent 95% confidence intervals. LMWH: Low-molecular-weight heparin; SAE: Serious Adverse Events; VTE: venous thromboembolism.

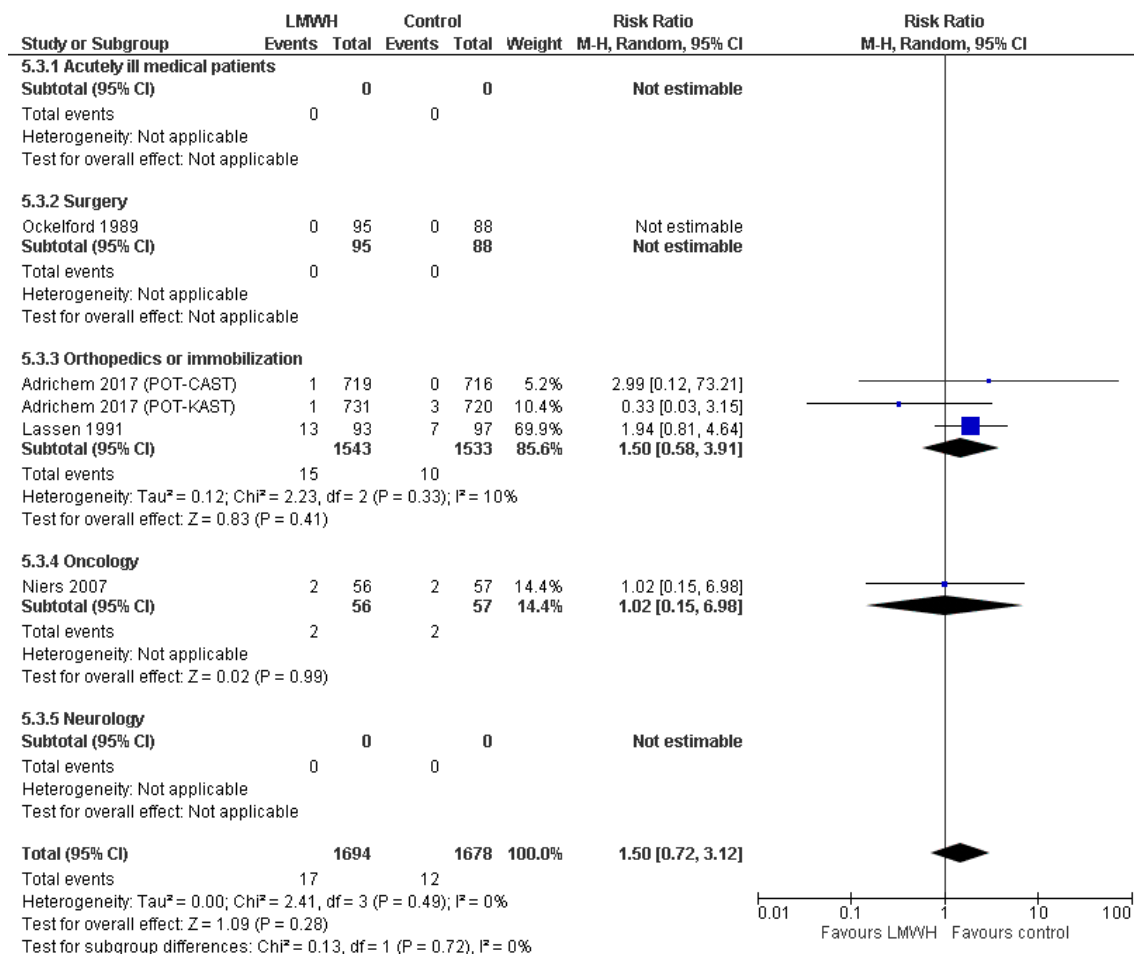

**Figure S2.** Forest plot of clinically relevant non-major bleeding, stratified for patient type; Forest plot of clinically relevant non-major bleeding at maximal follow-up of LMWH prophylaxis compared to placebo or no treatment, stratified according to patient type. Size of the squares reflects the weight of the trial in the pooled analysis. Horizontal bars represent 95% confidence intervals. LMWH: Low-molecular-weight heparin; VTE: venous thromboembolism.

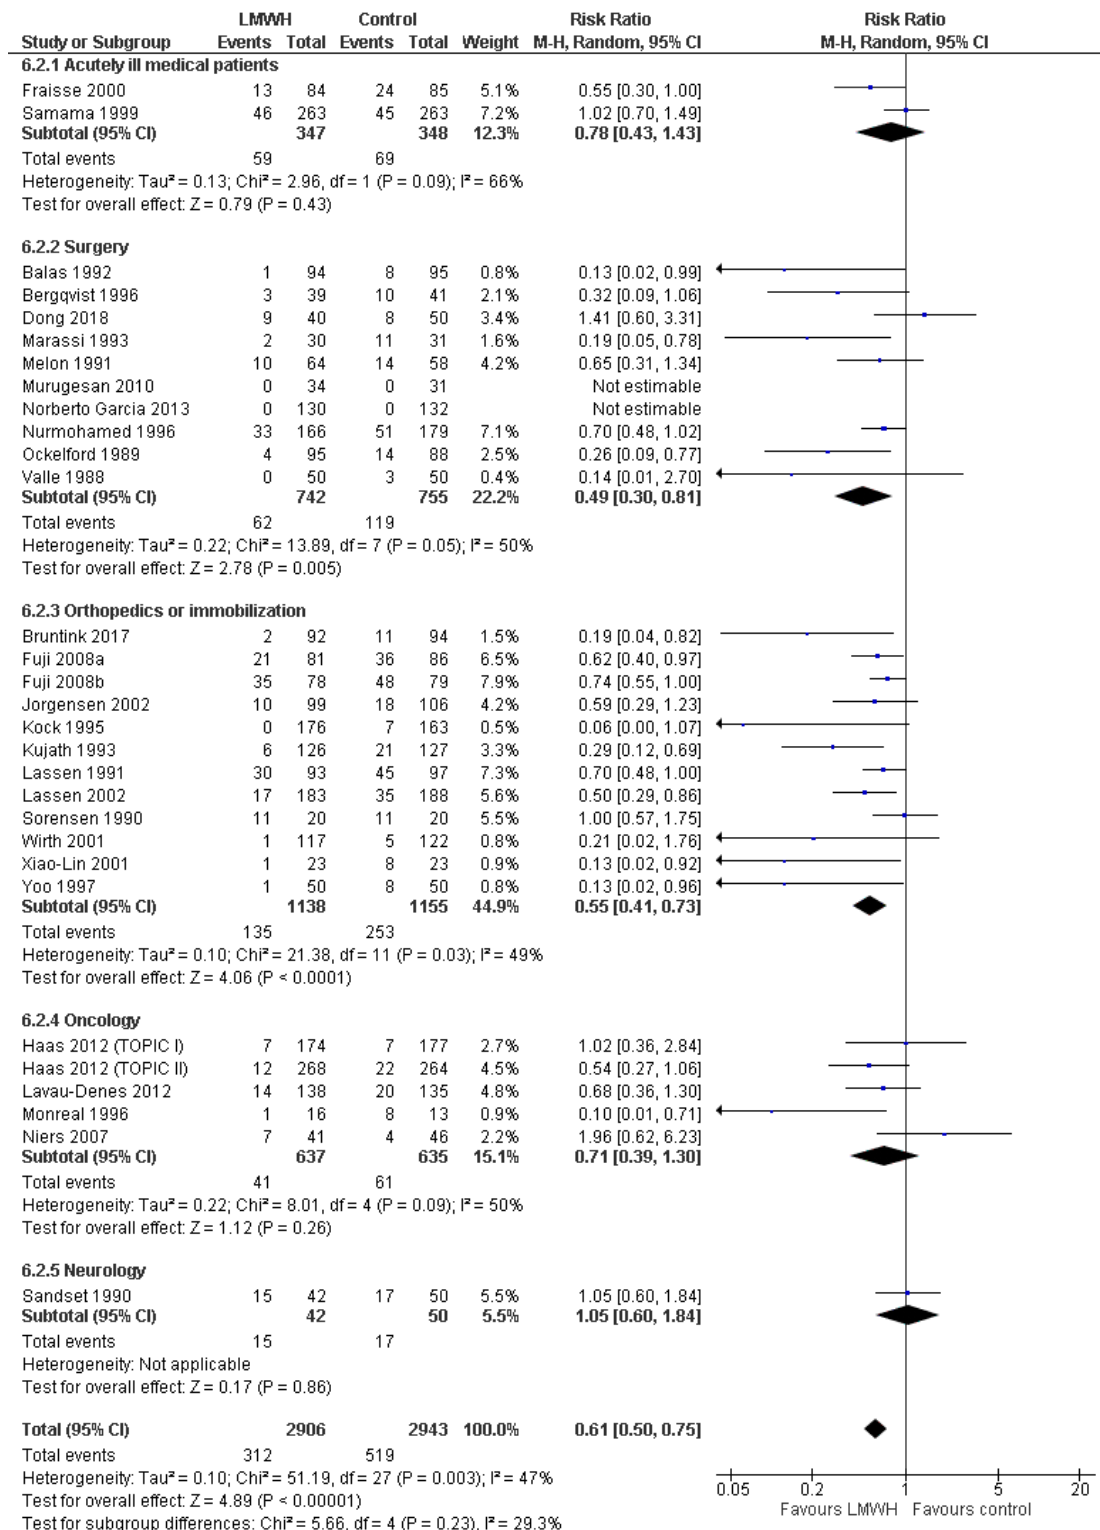

**Figure S3.** Forest plot of any VTE, stratified for patient type; Forest plot of any VTE at maximal follow-up of LMWH prophylaxis compared to placebo or no treatment, stratified according to patient type. Size of the squares reflects the weight of the trial in the pooled analysis. Horizontal bars represent 95% confidence intervals. LMWH: Low-molecular-weight heparin; VTE: venous thromboembolism.

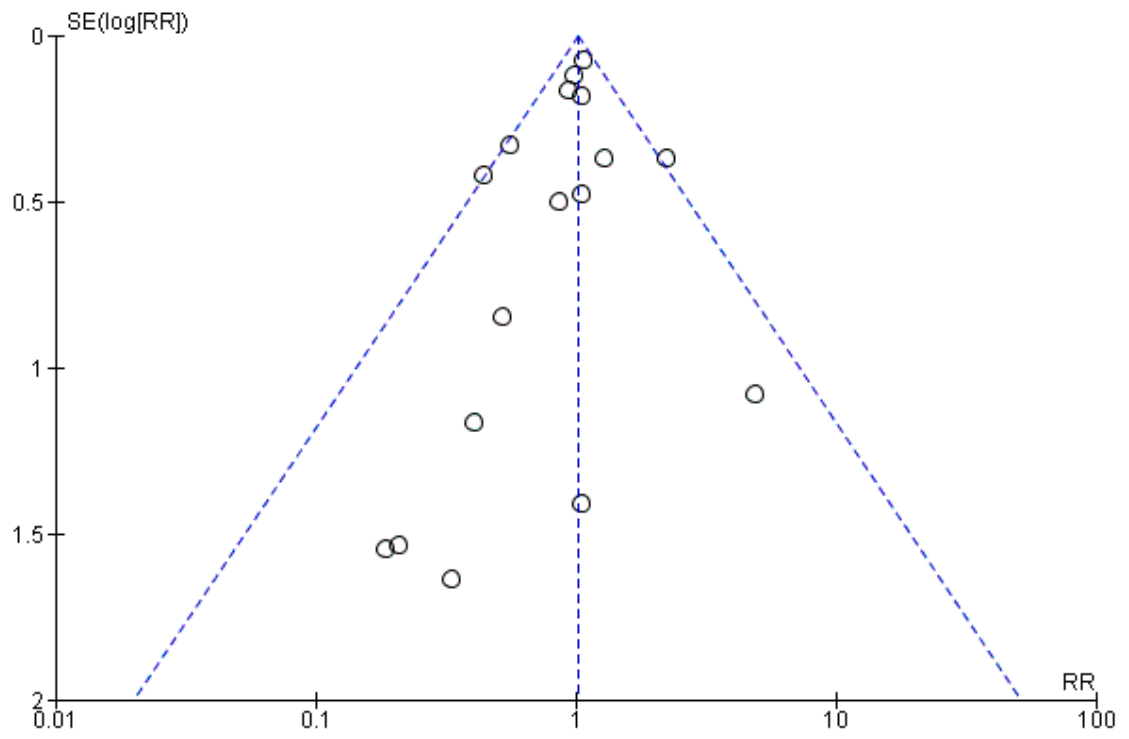

**Figure S4.** Funnel plot of all-cause mortality.

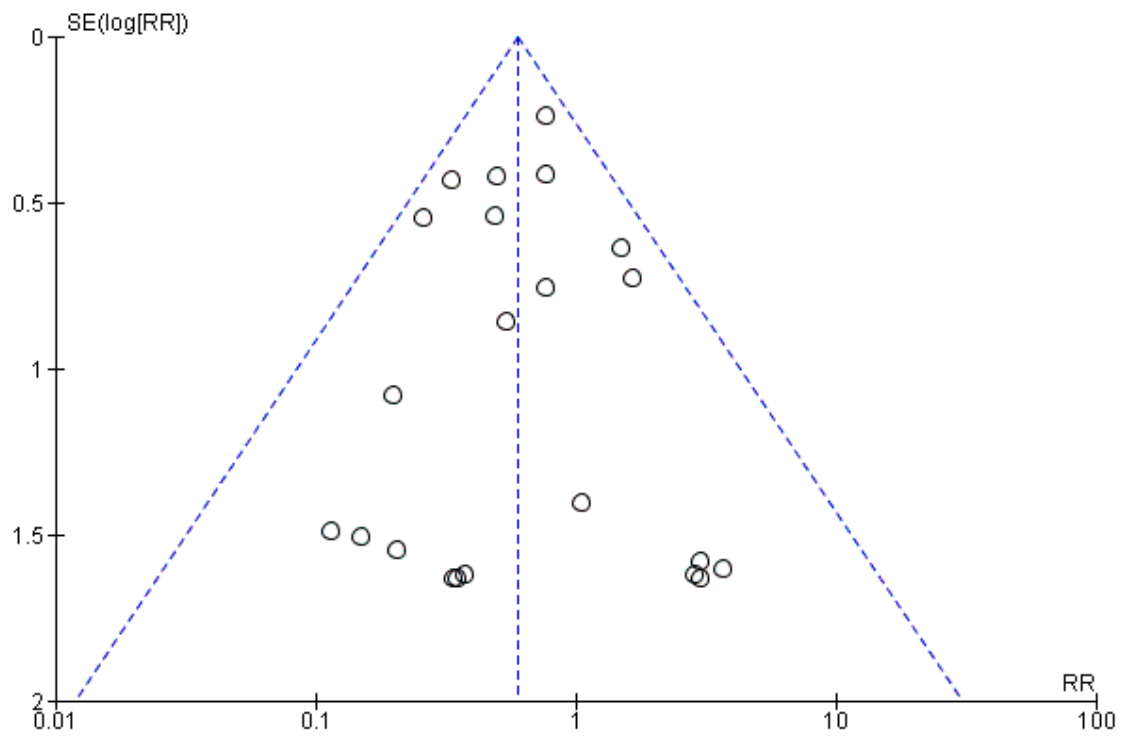

**Figure S5.** Funnel plot of symptomatic VTE.

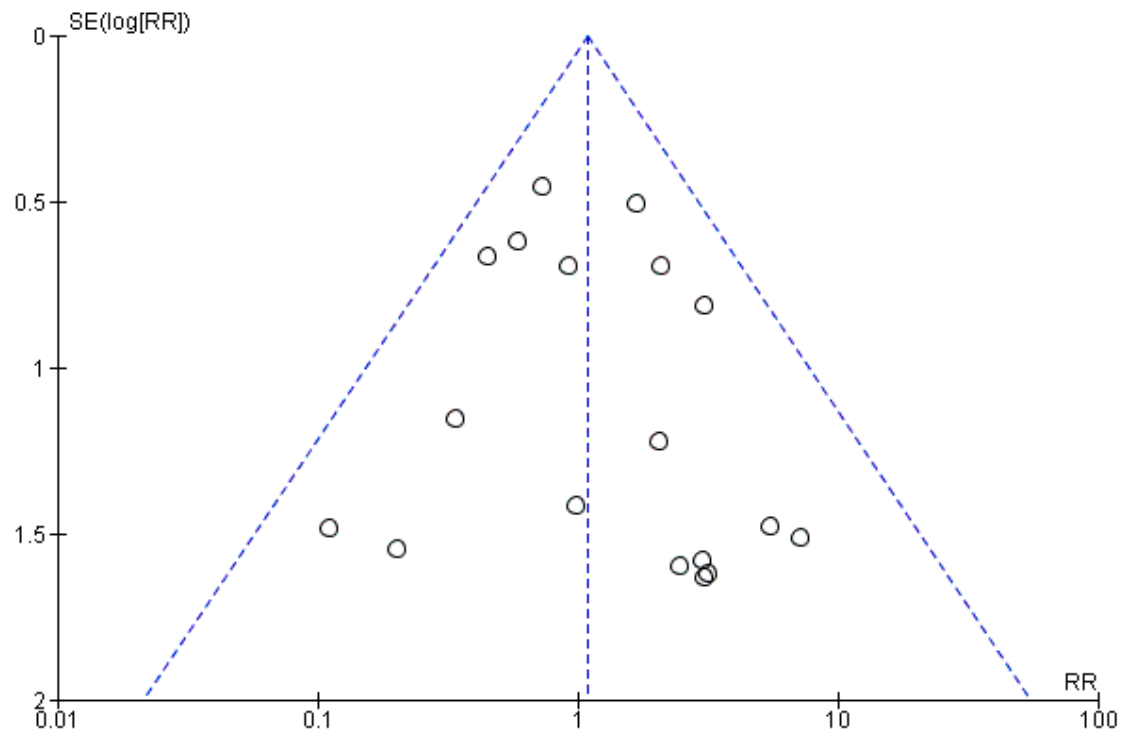

Figure S6. Funnel plot of major bleeding.

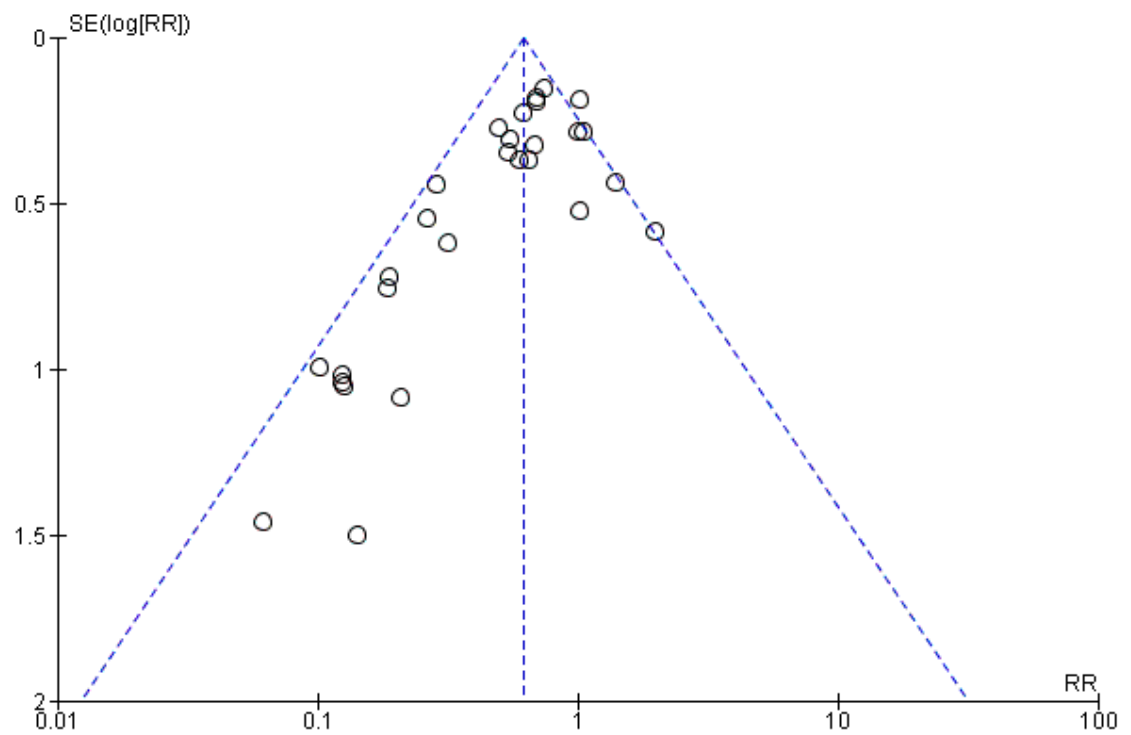

Figure S7. Funnel plot of any VTE

## References

1. Fraisse, F.; Holzapfel, L.; Couland, J.M.; Simonneau, G.; Bedock, B.; Feissel, M.; Herbecq, P.; Pordes, R.; Poussel, J.F.; Roux, L. Nadroparin in the prevention of deep vein thrombosis in acute decompensated COPD. *Am. J. Respir. Crit. Care Med.* **2000**, *161*, 1109–1114.
2. Mahé, I.; Bergmann, J.F.; D'Azémar, P.; Vaissie, J.J.; Caulin, C. Lack of effect of a low-molecular-weight heparin (nadroparin) on mortality in bedridden medical in-patients: A prospective randomised double-blind study. *Eur. J. Clin. Pharmacol.* **2005**, *61*, 347–351.
3. Ozcan, M.; Soydan, E.; Ustun, C.; Celebi, H.; Arslan, O.; Arat, M.; Gurman, G.; Ilhan, O.; Koc, N.; Konuk, A.; et al. The use of low molecular weight heparins (dalteparin) for prophylaxis against thromboembolic complications during allogeneic haematopoietic stem cell transplantation [Abstract]. In Proceedings of the EBMT; 2004; pp. 303–360.
4. Samama, M.M.; Cohen, A.T.; Darmon, J.Y.; Desjardins, L.; Eldor, A.; Janbon, C.; Leizorovicz, A.; Nguyen, H.; Olsson, C.G.; Turpie, A.G.; et al. A comparison of enoxaparin with placebo for the prevention of venous thromboembolism in acutely ill medical patients. *N. Engl. J. Med.* **1999**, *341*, 793–800.
5. Baca, I.; Schneider, B.; Kohler, T.; Misselwitz, F.; Zehle, A.; Muhe, F. Thromboembolieprophylaxe bei minimal-invasiven Eingriffen und kurzstationärer Behandlung. *Der Chir.* **1997**, *68*, 1275–1280.
6. Balas, P.E.; Athens, G.; Sanofi Recherche, F. Efficacy and safety of nadroparin (fraxiparine) versus placebo in the prophylactic treatment of deep vein thrombosis in patients with high thrombo-embolic risk undergoing general surgery. *Thromb. Res.* **2004**, *65*, S113.
7. Bergqvist, D.; Flordal, P.A.; Friberg, B.; Frisell, J.; Hedberg, M.; Ljungstrom, K.G.; Matzsch, T.; Torngren, S. Thromboprophylaxis with a low molecular weight heparin (Tinzaparin) in emergency abdominal surgery. *Zeitschrift fur Gefasskrankheiten* **1996**, *25*.
8. Burrows, R.F.; Gan, E.T.; Gallus, A.S.; Wallace, E.M.; Burrows, E.A. A randomised double-blind placebo controlled trial of low molecular weight heparin as prophylaxis in preventing venous thrombotic events after caesarean section: A pilot study. *Br. J. Obstet. Gynaecol.* **2001**, *108*, 835–839.
9. Dong, J.; Wang, J.; Feng, Y.; Li-Ping, Q.; Fang, H.; Wang, G.-D.; Wu, Z.-Q.; Wang, H.-Z.W.; Yang, Y.; Li, Q. Effect of low molecular weight heparin on venous thromboembolism disease in thoracotomy patients with cancer. *J. Thorac. Dis.* **2018**, *10*, 1850–1856.
10. Marassi, A.; Balzano, G.; Mari, G.; Viganò D'Angelo, S.; Della Valle, P.; Di Carlo, V.; D'Angelo, A. Prevention of Postoperative Deep Vein Thrombosis in Cancer Patients. A Randomized Trial with Low Molecular Weight Heparin (CY 216). *Int. Surg.* **1993**, *78*, 166–170.
11. Melon, E.; Keravel, Y.; Gaston, A.; Huet, Y.; Combes, S. Deep venous thrombosis prophylaxis by low molecular weight heparin in neurosurgical patients [abstract]. *Anesthesiology* **1991**, *75*.
12. Murugesan, A.; Srivastava, D.N.; Ballehaninna, U.K.; Chumber, S.; Dhar, A.; Misra, M.C.; Parshad, R.; Seenu, V.; Srivastava, A.; Gupta, N.P. Detection and Prevention of Post-Operative Deep Vein Thrombosis [DVT] Using Nadroparin Among Patients Undergoing Major Abdominal Operations in India; a Randomised Controlled Trial. *Indian J. Surg.* **2010**, *72*, 312–317.
13. Norberto Garcia, E.M.S.; Merino, B.; Taylor, J.H.; Vizcaino, I.; Vaquero, C. Low-Molecular-Weight Heparin for prevention of venous thromboembolism after varicose vein surgery in moderate-risk patients: a randomized, controlled trial. *Ann. Vasc. Surg.* **2013**, *27*, 940–946.
14. Nurmohamed, M.T.; Van Riel, A.M.; Henkens, C.M.A.; Koopman, M.M.W.; Que, G.T.H.; D'Azémar, P.; Büller, H.R.; Ten Cate, J.W.; Hoek, J.A.; Van Der Meer, J.; et al. Low molecular weight heparin and compression stockings in the prevention of venous thromboembolism in neurosurgery. *Thromb. Haemost.* **1996**, *75*, 233–238.
15. Ockelford, P.A.; Patterson, J.; Johns, A.S. A double-blind randomized placebo controlled trial of thromboprophylaxis in major elective general surgery using once daily injections of a low molecular weight heparin fragment (Fragmin). *Thromb. Haemost.* **1989**, *62*, 1046–1049.
16. Pezzuoli, G.; Sernerri, G.G.N.; Settembrini, P.G.; Coggi, G.; Olivari, N.; Negri, G.; Codemo, R.; Galli, G.; Roveri, S.; Negri, G.; et al. Effectiveness and safety of the low-molecular-weight heparin cy 216 in the prevention of fatal pulmonary embolism and thromboembolic death in general surgery: A multicentre, double-blind, randomized controlled clinical trial versus placebo (step). *Haemostasis* **1990**, *20*, 193–204.
17. Valle, I.; Sola, G.; Origone, A. Controlled clinical study of the efficacy of a new low molecular weight heparin administered subcutaneously to prevent post-operative deep venous thrombosis. *Curr. Med. Res. Opin.* **1988**, *11*, 80–86.
18. van Adrichem, R.A.; Nemeth, B.; Algra, A.; le Cessie, S.; Rosendaal, F.R.; Schipper, I.B.; Nelissen, R.G.H.H.; Cannegieter, S.C. Thromboprophylaxis after Knee Arthroscopy and Lower-Leg Casting. *N.*

- Engl. J. Med.* **2017**, *376*, 515–525.
19. Bruntink, M.M.; Groutars, Y.M.E.; Schipper, I.B.; Breederveld, R.S.; Tuinebreijer, W.E.; Derksen, R.J.; America, O.W.M.; van den Berg, W.; Bevort, A.H.; Bilars, P.M.; et al. Nadroparin or fondaparinux versus no thromboprophylaxis in patients immobilised in a below-knee plaster cast (PROTECT): A randomised controlled trial. *Injury* **2017**, *48*, 936–940.
  20. Fuji, T.; Ochi, T.; Niwa, S.; Fujita, S. Prevention of postoperative venous thromboembolism in Japanese patients undergoing total hip or knee arthroplasty: Two randomized, double-blind, placebo-controlled studies with three dosage regimens of enoxaparin. *J. Orthop. Sci.* **2008**, *13*, 442–451.
  21. Jorgensen, P.; Knudsen, J.B.; Broeng, L.; Josephsen, L.; Bjerregaard, P.; Hagen, K.; Jorgensen, P.; Torholm, C. The thromboprophylactic effect of a Low-Molecular-Weight Heparin (Fragmin) in Hip Fracture Surgery. A Placebo-Controlled Study. *Clin. Orthop. Relat. Res.* **1992**, 95–100.
  22. Kock, H.J.; Schmit-Neuerburg, K.P.; Hanke, J.; Rudofsky, G.; Hirsche, H. Thromboprophylaxis with low-molecular-weight heparin in outpatients with plaster-cast immobilisation of the leg. *Lancet* **1995**, *346*, 459–461.
  23. Kujath, P.; Spannagel, U.; Habscheid, W. Incidence and prophylaxis of deep venous thrombosis in outpatients with injury of the lower limb. *Haemostasis* **1993**, *23 Suppl 1*, 20–26.
  24. Lassen, M.R.; Borris, L.C.; Christiansen, H.M.; Boll, K.L.; Eiskjær, S.P.; Nielsen, B.W.; Schøstt, P.; Olsen, A.D.; Rodenberg, J.C.; Lucht, U. Prevention of thromboembolism in 190 hip arthroplasties: Comparison of LMW heparin and placebo. *Acta Orthop.* **1991**, *62*, 33–38.
  25. Lassen, M.R.; Borris, L.C.; Nakov, R.L. Use of the low-molecular-weight heparin reviparin to prevent deep-vein thrombosis after leg injury requiring immobilization. *N. Engl. J. Med.* **2002**, *347*, 726–730.
  26. Levine, M.N.; Gent, M.; Hirsh, J.; Weitz, J.; Turpie, A.G.; Powers, P.; Neemeh, J.; Willan, A.; Skingley, P. Ardeparin (low-molecular-weight heparin) vs graduated compression stockings for the prevention of venous thromboembolism. A randomized trial in patients undergoing knee surgery. *Arch. Intern. Med.* **1996**, *156*, 851–6.
  27. Xiao-Lin, L.; Wei-Jie, L.; Nan-Sheng, Y. Prophylaxis for deep vein thrombosis with low molecular weight heparin following hip and knee surgery. *Chinese J reparative Reconstr. Surg.* **2001**, *15*, 39–41.
  28. Sørensen, J. V.; Lassen, M.R.; Borris, L.C.; Jørgensen, P.S.; Schøtt, P.; Weber, S.; Murphy, R.; Walenga, J. Association between plasma levels of tissue plasminogen activator and postoperative deep vein thrombosis -influence of prophylaxis with a low molecular weight heparin. *Thromb. Res.* **1990**, *60*, 247–251.
  29. Roth, V.P. Prophylaxis of deep vein thrombosis in outpatients undergoing arthroscopic meniscus operation. *Orthop. Prax.* **1995**, *5*, 345–347.
  30. Wirth, T.; Schneider, B.; Misselwitz, F.; Lomb, M.; Tüylü, H.; Egbring, R.; Griss, P. Prevention of venous thromboembolism after knee arthroscopy with low-molecular weight heparin (Reviparin): Results of a randomized controlled trial. *Arthroscopy* **2001**, *17*, 393–399.
  31. Yoo, C., M.; Kang, S., C.; Kim, H., Y.; Kim, K., S. A prospective randomized study on the use of nadroparin calcium in the prophylaxis of thromboembolism in Korean patients undergoing elective total hip replacement. *Int. Orthop.* **1997**, *21*, 399–402.
  32. Agnelli, G.; George, D.J.; Kakkar, A.K.; Fisher, W.; Lassen, M.R.; Mismetti, P.; Mouret, P.; Chaudhari, U.; Lawson, F.; Turpie, A.G.G.; et al. Semuloparin for thromboprophylaxis in patients receiving chemotherapy for cancer. *N. Engl. J. Med.* **2012**, *366*, 601–609.
  33. Agnelli, G.; Gussoni, G.; Bianchini, C.; Verso, M.; Mandala, M.; Cavanna, L.; Barni, S.; Labianca, R.; Buzzi, F.; Scambia, G.; et al. Nadroparin for the prevention of thromboembolic events in ambulatory patients with metastatic or locally advanced solid cancer receiving chemotherapy: a randomised, placebo-controlled, double-blind study. *Lancet. Oncol.* **2009**, *10*, 943–949.
  34. Haas, S.K.; Freund, M.; Heigener, D.; Heilmann, L.; Kemkes-Matthes, B.; Tempelhoff, G.-F. von; Melzer, N.; Kakkar, A.K.; TOPIC Investigators; von Tempelhoff, G.-F.; et al. Low-Molecular-Weight Heparin Versus Placebo for the Prevention of Venous Thromboembolism in Metastatic Breast Cancer or Stage III/IV Lung Cancer. *Clin. Appl. Thromb. Hemost.* **2012**, *18*, 159–165.
  35. Lavau-Denes, S.; Lacroix, P.; Maubon, A.; Preux, P.M.; Genet, D.; Vénat-Bouvet, L.; Labourey, J.L.; Martin, J.; Slaouti, P.; Tubiana-Mathieu, N. Prophylaxis of catheter-related deep vein thrombosis in cancer patients with low-dose warfarin, low molecular weight heparin, or control: A randomized, controlled, phase III study. *Cancer Chemother. Pharmacol.* **2013**, *72*, 65–73.
  36. Monreal, M.; Alastrue, A.; Miquel, R.; Mira, X.; Muxart, J.; Rosell, R.; Abad, A. Upper Extremity Deep Venous Thrombosis in Cancer Patients with Venous Access Devices - Prophylaxis with a Low Molecular Weight Heparin (Fragmin). *Thromb. Haemost.* **1996**, *75*, 251–253.

37. Niers, T.M.H.; Di Nisio, M.; Klerk, C.P.W.; Baarslag, H.J.; Büller, H.R.; Biemond, B.J. Prevention of catheter-related venous thrombosis with nadroparin in patients receiving chemotherapy for hematologic malignancies: A randomized, placebo-controlled study. *J. Thromb. Haemost.* **2007**, *5*, 1878–1882.
38. Weber, C.; Merminod, T.; Herrmann, F.R.; Zulian, G.B. Prophylactic anti-coagulation in cancer palliative care: A prospective randomised study. *Support. Care Cancer* **2008**, *16*, 847–852.
39. Elias, A.; Milandre, L.; Lagrange, G.; Aillaud, M.F.; Alonzo, B.; Toulemonde, F.; Juhan-Vague, I.; Khalil, R.; Bayrou, B.; Serradimigni, A. Prevention of deep venous thrombosis of the leg by a very low molecular weight heparin fraction (CY 222) in patients with hemiplegia following cerebral infarction: a randomized pilot study (30 patients)]. *La Rev. Med. interne* **1989**, *11*, 95–8.
40. Sandset, P.M.; Dahl, T.; Stiris, M.; Rostad, B.; Scheel, B.; Abildgaard, U. A double-blind and randomized placebo-controlled trial of low molecular weight heparin once daily to prevent deep-vein thrombosis in acute ischemic stroke. *Semin. Thromb. Hemost.* **1990**, *16 Suppl*, 25–33.
41. Wurm, G.; Tomancok, B.; Nussbaumer, K.; Adelwöhrer, C.; Holl, K. Reduction of ischemic sequelae following spontaneous subarachnoid hemorrhage: A double-blind, randomized comparison of enoxaparin versus placebo. *Clin. Neurol. Neurosurg.* **2004**, *106*, 97–103.
